# Supplementary material
Source: PubMed Central journal article supplement (PMC6647842)
Supplement: NIHMS1035117-supplement-1.pdf [file NIHMS1035117-supplement-1.pdf]

## **Efficacy of Coronary Sinus Reduction in Refractory Angina**

Stefan Verheye MD PhD, E. Marc Jolicœur MD MSc MHS, Miles W Behan MD, Thomas Pettersson MD, Paul Sainsbury MD, Jonathan Hill MD, Mathias Vrolix MD, Pierfrancesco Agostoni MD, Thomas Engstrom MD, Marino Labinaz MD, Ranil de Silva MD, Marc Schwartz RCIS, Nathalie Meyten1 MD, Neal G Uren MD, Serge Doucet MD, Jean-Francois Tanguay MD, Steven Lindsay MD, Timothy D. Henry MD, Christopher J. White MD, Elazer R Edelman MD PhD, Shmuel Banai MD

### **SUPPLEMENTARY APPENDIX**

| Content                                          | Page |
|--------------------------------------------------|------|
| 1. COSIRA Investigators                          | 2    |
| 2. COSIRA Committees                             | 2-5  |
| 3. Inclusion and exclusion criteria in COSIRA    | 6    |
| 4. Details of the study outcome assessments      | 7-8  |
| 5. Supplementary tables                          |      |
| • Table S1: Seattle Angina Questionnaire Data    | 9    |
| • Table S2: Exercise Stress Test Data            | 11   |
| • Table S3:Dobutamine Stress Echo Data           | 13   |
| • Table S4:Periprocedural Serious Adverse Events | 14   |
| • Table S5:Serious Adverse Events                | 15   |
| 6. References                                    | 16   |

## 1. COSIRA Investigators:

Stefan Verheye, MD, PhD<sup>1</sup>; Nathalie Meyten, MD<sup>1</sup>;  
E. Marc Jolicœur, MD<sup>2</sup>; Serge Doucet, MD<sup>2</sup>; Jean-Francois Tanguay, MD<sup>2</sup>  
Miles Behan, MD<sup>3</sup>; Neal Uren, MD<sup>3</sup>  
Thomas Pettersson, MD<sup>4</sup>  
Paul Sainsbury, MD<sup>5</sup>; Steven Lindsay, MD<sup>5</sup>  
Jonathan Hill, MD<sup>6</sup>  
Mathias Vrolix, MD<sup>7</sup>  
Pierfrancesco Agostoni, MD<sup>8</sup>  
Thomas Engstrom, MD<sup>9</sup>  
Marino Labinaz, MD<sup>10</sup>  
Ranil de Silva, MD<sup>11</sup>  
Marc Schwartz, RCIS<sup>12</sup>  
Timothy D. Henry, MD<sup>13</sup>  
Christopher J. White, MD<sup>14</sup>  
Elazer Edelman, MD, PhD<sup>15</sup>  
Shmuel Banai, MD<sup>16</sup>

<sup>1</sup>Antwerp Cardiovascular Center, ZNA Middelheim, Antwerp, Belgium

<sup>2</sup>Montreal Heart Institute, Montreal, Canada

<sup>3</sup>Royal Infirmary of Edinburgh, Edinburgh, UK

<sup>4</sup>Kristianstad Central Hospital, Kristianstad, Sweden

<sup>5</sup>Bradford Royal Infirmary, Bradford, UK

<sup>6</sup>Kings College Hospital, London, UK

<sup>7</sup>ZOL Hospital, Genk, Belgium

<sup>8</sup>University Medical Center Utrecht, Utrecht, Netherlands

<sup>9</sup>Rigshospitalet, Copenhagen, Denmark

<sup>10</sup>Ottawa Heart Institute, Ottawa, Canada

<sup>11</sup>National Heart and Lung Institute, Imperial College London and NIHR  
Cardiovascular Biomedical Research Unit, Royal Brompton and Harefield NHS  
Foundation Trust. London, UK

<sup>12</sup>Neovasc, Inc. Richmond, BC, Canada

<sup>13</sup>Cedars- Sinai Medical Center, Los Angeles, CA

<sup>14</sup>The John Ochsner Heart & Vascular Institute, Ochsner Clinical School, University of  
Queensland, New Orleans, LA, USA

<sup>15</sup>Institute for Medical Engineering and Science, MIT, Cambridge, MA USA, and  
Cardiovascular Division Brigham and Women's Hospital, Harvard Medical School,  
Boston MA

<sup>16</sup>Tel Aviv Medical Center, The Tel Aviv University Medical School, Tel Aviv, Israel

## 2. COSIRA committees:

### Clinical events committee (CEC)

Giovanni Amoroso, MD, PhD  
Onze Lieve Vrouwe Gasthuis  
Postbus 95500  
1090 HM Amsterdam, Netherlands

Lieven Herbots, MD, PhD  
Jessa Ziekenhuis  
Stadsomvaart 11  
3500 Hasselt, Belgium

Kees-Jan Royaards, MD  
Maasstad Ziekenhuis  
Groene Hilledijk 315  
3075 Rotterdam, Netherlands

### Data and safety monitoring board (DSMB)

Christophe Dubois, MD, PhD  
UZ Leuven  
Campus Gasthuisberg  
Herestraat 49  
B - 3000 Leuven, Belgium  
Tel: 32 16 34 42 35

Kaatje Goetschalckx, MD  
UZ Leuven  
Campus Gasthuisberg  
Herestraat 49  
B - 3000 Leuven, Belgium  
Tel: 32 16 34 42 35

A.J.J. IJsselmuiden, MD, PhD  
Albert Schweitzer Hospital  
Albert Schweitzerplaats 25  
3318 AT Dordrecht, Netherlands  
Tel: 31 78-6541111

Keith G. Oldroyd, MD  
West of Scotland Regional Heart & Lung Centre  
Golden Jubilee National Hospital  
Agamemnon Street  
Clydebank, Scotland G81 4DY  
Tel: 44 141 951 5180

Steering Committee Members

Stefan Verheye, MD, PhD  
ZNA Middelheim Hospital  
Antwerp, Belgium  
Tel: 32 49 6862375

Shmuel Banai, MD  
Tel Aviv Medical Center  
6 Weitzman St  
Tel Aviv, 64239 Israel  
Tel: 972 3 697 3395

E. Marc Jolicoeur, MD, MSc, MHS  
Montreal Heart Institute  
5000 Bélanger Street  
Montréal, QC H1T 1C8  
Tel: (514) 376-3330 x 3249

Marc Schwartz, RCIS  
Neovasc Inc.  
13700 Mayfield Place, Suite 2135  
Richmond, BC V6V 2E4  
Tel: (847) 494-0660

Elazer Edelman, MD, PhD  
Brigham and Women's Hospital  
75 Francis Street  
Boston, MA 02115  
Tel: (617) 471-2003

Christopher White, MD  
Ochsner Medical Center  
1514 Jefferson Highway  
New Orleans, LA 70121  
Tel: (504) 842-3717

Timothy Henry, MD  
Cedars-Sinai Medical Center  
127 S San Vicente Boulevard, SuiteA-3100  
Los Angeles, CA 90048  
Tel: (310) 423-3300

Michael Jaff, DO  
Massachusetts General Hospital  
55 Fruit Street, Suite 5B  
Boston, MA 02114  
Tel: (617) 726-3784

### 3. Inclusion and Exclusion criteria for COSIRA

|                                                                                                                                                                                                                                                                                                                                                                                                                                                                                                                                                                                                                                                                                                                                                                                                                                                                                                                                                                                                                                                                                                                                                                                                                                                                                                                                                                                                                                                                                                                                                                               |
|-------------------------------------------------------------------------------------------------------------------------------------------------------------------------------------------------------------------------------------------------------------------------------------------------------------------------------------------------------------------------------------------------------------------------------------------------------------------------------------------------------------------------------------------------------------------------------------------------------------------------------------------------------------------------------------------------------------------------------------------------------------------------------------------------------------------------------------------------------------------------------------------------------------------------------------------------------------------------------------------------------------------------------------------------------------------------------------------------------------------------------------------------------------------------------------------------------------------------------------------------------------------------------------------------------------------------------------------------------------------------------------------------------------------------------------------------------------------------------------------------------------------------------------------------------------------------------|
| <b>A. Inclusion criteria</b>                                                                                                                                                                                                                                                                                                                                                                                                                                                                                                                                                                                                                                                                                                                                                                                                                                                                                                                                                                                                                                                                                                                                                                                                                                                                                                                                                                                                                                                                                                                                                  |
| <ol style="list-style-type: none"><li>1. Patient &gt; 18 years of age</li><li>2. Symptomatic CAD with chronic refractory angina pectoris classified as CCS class III or IV despite attempted optimal medical therapy for 30 days prior to screening</li><li>3. Patient has limited treatment options for revascularization by CABG or PCI</li><li>4. Evidence of reversible ischemia that is attributable to the left coronary arterial system</li><li>5. Left ventricular ejection fraction &gt; 25%</li><li>6. Male or non-pregnant female (NB: Females of child bearing potential must have a negative pregnancy test)</li><li>7. Patient understands the nature of the procedure and provides written informed consent prior to enrollment</li><li>8. Patient is willing to comply with specified follow-up evaluation and can be contacted by telephone</li></ol>                                                                                                                                                                                                                                                                                                                                                                                                                                                                                                                                                                                                                                                                                                        |
| <b>B. Exclusion criteria</b>                                                                                                                                                                                                                                                                                                                                                                                                                                                                                                                                                                                                                                                                                                                                                                                                                                                                                                                                                                                                                                                                                                                                                                                                                                                                                                                                                                                                                                                                                                                                                  |
| <b>Clinical</b> <ol style="list-style-type: none"><li>1. Recent (&lt; 3 months) acute coronary syndrome</li><li>2. Recent (&lt;6 months) successful PCI or CABG</li><li>3. Recent (&lt; 1 month) unstable angina (recent onset, crescendo, or rest angina with ECG changes)</li><li>4. De-compensated CHF or hospitalization due to CHF during the 3 months prior to screening</li><li>5. Patient with pacemaker or defibrillator electrode in the right atrium, right ventricle, or coronary sinus</li><li>6. Life-threatening rhythm disorders or any rhythm disorders requiring an internal defibrillator and or pacemaker</li><li>7. Severe COPD as indicated by a forced expiratory volume in one second &lt; 55% of the predicted value</li><li>8. Patient cannot undergo exercise tolerance test (bicycle) for reasons other than refractory angina</li><li>9. Severe valvular heart disease</li><li>10. Patient having undergone tricuspid valve replacement or repair</li><li>11. Chronic renal failure (serum creatinine &gt;2 mg/dL), including patients on chronic hemodialysis</li><li>12. Moribund patients, or patients with comorbidities limiting life expectancy &lt; 1 year</li><li>13. Contraindication to required study medications that cannot be adequately controlled with pre-medication</li><li>14. Known allergy to stainless steel or nickel</li><li>15. Currently enrolled in another investigational device or drug trial that has not completed the primary endpoint or that clinically interferes with the current study endpoints</li></ol> |
| <b>Anatomical</b> <ol style="list-style-type: none"><li>16. Mean right atrial pressure <math>\geq</math> 15 mmHg</li><li>17. Patient with anomalous or abnormal CS as demonstrated by angiographic abnormalities defined either:<ol style="list-style-type: none"><li>a. Abnormal CS anatomy (<i>e.g.</i>, tortuosity, aberrant branch, persistent left SVC) and/or;</li><li>b. CS diameter at the site of planned Reducer implantation &lt; 9.5 mm or &gt; 13 mm</li></ol></li></ol>                                                                                                                                                                                                                                                                                                                                                                                                                                                                                                                                                                                                                                                                                                                                                                                                                                                                                                                                                                                                                                                                                         |

#### 4. Details of the study outcome assessments:

**Outcomes:** At baseline all participants underwent 1) a clinical interview to determine the CCS class, 2) physical examination, 3) symptom-limited stress test, 4) dobutamine stress echocardiogram, and 5) Seattle Angina Questionnaire (SAQ).

CCS Class: Participants were assessed for CCS grade at discharge, 30-days, 3 and 6-months. To maintain blinding, clinical follow-up was done by investigators blinded to the treatment allocation.

Safety: Adverse or serious adverse device-related events were monitored peri-procedurally, prior to hospital discharge, and at the 6-month follow-up. Procedural success was defined as successful delivery and deployment of the Reducer at the intended site in the absence of adverse or serious adverse device-related events. Major adverse events were defined as a composite of death, myocardial infarction (MI), cardiac tamponade, life-threatening arrhythmias (ventricular tachycardia or fibrillation), and respiratory failure 30-days and 6-month post-procedure, as adjudicated by the CEC.

Stress testing: A bicycle ergometry stress-test adapted from the ACIP protocol<sup>13</sup> was selected because the incremental increases in exercise workload are more gradual ( $\leq 1.5$  METS/stage) compared to the larger work demands inherent in Bruce protocol treadmill testing.<sup>1</sup> Baseline and 6-month results were compared.

Dobutamine echocardiography: Wall motion of each of 16-segments at rest and during peak dobutamine infusion was quantified (1-normal, 2-hypokinetic, 3-akinetic, 4-dyskinetic, 5-aneurysmal),<sup>2</sup> and the summed wall motion scores of myocardial segments divided by the number of segments to provide a Wall-Motion-Score Index (WMSI). Baseline and 6-month WMSI at rest and stress were compared. A modified LCA WMSI was also computed using 11-segments attributed to the LCA territory. Stress test and dobutamine echo data were interpreted by an independent core laboratory blinded to treatment assignment.

SAQ Score: a brief 19-item self-administered questionnaire that captures five perspectives: physical limitation, angina stability, angina frequency, treatment satisfaction, and disease perception was used to assess quality of life. The SAQ was repeated at 30-days, 3 and 6-months.<sup>3</sup>

Computed Tomography Angiography (CTA): In patients assigned to the Reducer, CTA was performed at 6-months to document the patency of the Reducer in the CS. To limit radiation exposure, this test was only performed in patients assigned to the Reducer and performed after the final CCS class assessment has been fulfilled to maintain blinding.



## 5. Supplementary tables

**Quality of life** assessed by Seattle Angina Questionnaire (SAQ) shows a statistically significant change from baseline to 6-month follow-up for the Reducer group ( $17.6 \pm 26.2$ ) compared with the Control group ( $7.6 \pm 23.3$ ,  $p = 0.048$ ). Additionally, there were strong trends favouring the Reducer group in: anginal stability and anginal frequency as measured by SAQ; time to 1 mm ST segment depression and total exercise duration by ETT; and stress modified left coronary artery WMSI by DSE. The percentage changes in the endpoints of interest in the intent-to-treat population are summarized in the tables 3, 4 and 5.

**Table S1:** Seattle Angina Questionnaire (SAQ): (Changes from Baseline to 6 months follow up – Intent-to-Treat)

| <b>Physical Limitations</b>                                                          |                         |                         |                              |
|--------------------------------------------------------------------------------------|-------------------------|-------------------------|------------------------------|
| <b>SAQ – Physical Limitations</b>                                                    | <b>Reducer<br/>N=51</b> | <b>Control<br/>N=47</b> | <b>All Patients<br/>N=98</b> |
| Baseline – mean (SD)                                                                 | 47.4 (24.7)             | 45.4 (24.5)             | 46.4 (24.5)                  |
| 6-month follow-up – mean (SD)                                                        | 56.5 (27.1)             | 52.8 (26.7)             | 54.7 (26.9)                  |
| $\Delta$ (baseline to 6MFU) – mean (SD)                                              | 9.2 (20.2)              | 7.4 (22.1)              | 8.3 (21.0)                   |
| % $\Delta$ (baseline to 6MFU)                                                        | <b>19.41%</b>           | <b>16.30%</b>           | <b>17.89%</b>                |
| <b>t-Test: <math>\Delta</math> in Baseline to 6MFU<br/>Control vs. Reducer group</b> | <b>p = 0.675*</b>       |                         | –                            |
| <b>Anginal Stability</b>                                                             |                         |                         |                              |
| <b>SAQ – Anginal Stability</b>                                                       | <b>Reducer<br/>N=51</b> | <b>Control<br/>N=48</b> | <b>All Patients<br/>N=99</b> |
| Baseline – mean (SD)                                                                 | 43.1 (22.4)             | 39.1 (25.7)             | 41.2 (24.0)                  |
| 6-month follow-up – mean (SD)                                                        | 61.3 (27.5)             | 47.4 (25.9)             | 54.5 (27.5)                  |
| $\Delta$ (baseline to 6MFU) – mean (SD)                                              | 18.1 (32.4)             | 8.3 (37.3)              | 13.4 (35.0)                  |
| % $\Delta$ (baseline to 6MFU)                                                        | <b>42.00%</b>           | <b>21.23%</b>           | <b>32.52%</b>                |
| <b>t-Test: <math>\Delta</math> in Baseline to 6MFU<br/>Control vs. Reducer group</b> | <b>p = 0.165*</b>       |                         | –                            |
| <b>Anginal Frequency</b>                                                             |                         |                         |                              |
| <b>SAQ – Anginal Frequency</b>                                                       | <b>Reducer<br/>N=51</b> | <b>Control<br/>N=48</b> | <b>All Patients<br/>N=99</b> |
| Baseline – mean (SD)                                                                 | 43.7 (25.9)             | 46.7 (28.8)             | 45.2 (27.3)                  |
| 6-month follow-up – mean (SD)                                                        | 59.0 (29.3)             | 57.7 (29.1)             | 58.4 (29.1)                  |
| $\Delta$ (baseline to 6MFU) – mean (SD)                                              | 15.3 (28.9)             | 11.0 (24.9)             | 13.2 (27.0)                  |
| % $\Delta$ (baseline to 6MFU)                                                        | <b>35.01%</b>           | <b>23.55%</b>           | <b>29.20%</b>                |
| <b>t-Test: <math>\Delta</math> in Baseline to 6MFU<br/>Control vs. Reducer group</b> | <b>p = 0.436*</b>       |                         | –                            |

| <b>Treatment Satisfaction</b>                                      |                         |                         |                              |
|--------------------------------------------------------------------|-------------------------|-------------------------|------------------------------|
| <b>SAQ – Treatment Satisfaction</b>                                | <b>Reducer<br/>N=51</b> | <b>Control<br/>N=48</b> | <b>All Patients<br/>N=99</b> |
| Baseline – mean (SD)                                               | 79.7 (18.6)             | 77.6 (18.1)             | 78.6 (18.3)                  |
| 6-month follow-up – mean (SD)                                      | 82.6 (17.6)             | 80.4 (19.3)             | 81.5 (18.4)                  |
| Δ (baseline to 6MFU) – mean (SD)                                   | 2.9 (16.6)              | 2.9 (15.8)              | 2.9 (16.2)                   |
| % Δ (baseline to 6MFU)                                             | <b>3.64%</b>            | <b>3.74%</b>            | <b>3.69%</b>                 |
| <b>t-Test: Δ in Baseline to 6MFU<br/>Control vs. Reducer group</b> | <b>p = 0.981*</b>       |                         | –                            |
| <b>Quality of Life</b>                                             |                         |                         |                              |
| <b>SAQ – Quality of Life</b>                                       | <b>Reducer<br/>N=51</b> | <b>Control<br/>N=48</b> | <b>All Patients<br/>N=99</b> |
| Baseline – mean (SD)                                               | 42.3 (19.7)             | 46.9 (20.6)             | 44.5 (20.2)                  |
| 6-month follow-up – mean (SD)                                      | 60.0 (23.7)             | 54.5 (27.0)             | 57.3 (25.4)                  |
| Δ (baseline to 6MFU) – mean (SD)                                   | 17.6 (26.2)             | 7.6 (23.3)              | 12.8 (25.2)                  |
| % Δ (baseline to 6MFU)                                             | <b>41.61%</b>           | <b>16.20%</b>           | <b>28.76%</b>                |
| <b>t-Test: Δ in Baseline to 6MFU<br/>Control vs. Reducer group</b> | <b>p = 0.048*</b>       |                         | –                            |

\* Student's t-test

**Table S2:** Exercise Tolerance Test (Changes from Baseline to 6 months follow up – Intent-to-Treat)

| <b>Total Exercise Duration</b>                                                   |                         |                         |                              |
|----------------------------------------------------------------------------------|-------------------------|-------------------------|------------------------------|
| <b>Exercise Duration (seconds)</b>                                               | <b>Reducer<br/>N=42</b> | <b>Control<br/>N=48</b> | <b>All Patients<br/>N=90</b> |
| Baseline – mean (SD)                                                             | 441.29 (193.74)         | 463.67 (256.84)         | 453.22 (228.59)              |
| 6-month follow-up – mean (SD)                                                    | 499.81 (194.32)         | 467.25 (245.68)         | 482.44 (222.57)              |
| $\Delta$ (baseline to 6MFU) – mean (SD)                                          | 58.52 (161.26)          | 3.58 (125.81)           | 29.22 (145.26)               |
| % $\Delta$ (baseline to 6MFU)                                                    | <b>13.26%</b>           | <b>0.77%</b>            | <b>6.45%</b>                 |
| <b>t-Test: <math>\Delta</math> in Baseline to 6MFU Control vs. Reducer group</b> | <b>p = 0.073*</b>       |                         | –                            |
| <b>Time to 1 mm ST Segment Depression</b>                                        |                         |                         |                              |
| <b>Time to 1 mm ST Segment Depression</b>                                        | <b>Reducer<br/>N=11</b> | <b>Control<br/>N=11</b> | <b>All Patients<br/>N=22</b> |
| Baseline – mean (SD)                                                             | 384.82 (137.23)         | 437.09 (154.14)         | 410.95 (144.90)              |
| 6-month follow-up – mean (SD)                                                    | 433.36 (184.98)         | 455.55 (180.40)         | 444.45 (178.66)              |
| $\Delta$ (baseline to 6MFU) – mean (SD)                                          | 48.55 (79.83)           | 18.45 (87.21)           | 33.50 (83.03)                |
| % $\Delta$ (baseline to 6MFU)                                                    | <b>12.62%</b>           | <b>4.22%</b>            | <b>8.15%</b>                 |
| <b>t-Test: <math>\Delta</math> in Baseline to 6MFU Control vs. Reducer group</b> | <b>p = 0.409*</b>       |                         | –                            |
| <b>Maximal ST Segment Depression</b>                                             |                         |                         |                              |
| <b>Maximal ST Segment Depression (mm)</b>                                        | <b>Reducer<br/>N=19</b> | <b>Control<br/>N=18</b> | <b>All Patients<br/>N=37</b> |
| Baseline – mean (SD)                                                             | -1.14 (0.54)            | -1.01 (0.82)            | -1.08 (0.69)                 |
| 6-month follow-up – mean (SD)                                                    | -1.16 (0.62)            | -0.77 (1.27)            | -0.97 (1.00)                 |
| $\Delta$ (baseline to 6MFU) – mean (SD)                                          | -0.02 (0.48)            | 0.23 (0.82)             | 0.11 (0.67)                  |
| % $\Delta$ (baseline to 6MFU)                                                    | <b>1.40%</b>            | <b>-22.77%</b>          | <b>-10.19%</b>               |
| <b>t-Test: <math>\Delta</math> in Baseline to 6MFU Control vs. Reducer group</b> | <b>p = 0.266*</b>       |                         | –                            |
| <b>METs</b>                                                                      |                         |                         |                              |
| <b>METs</b>                                                                      | <b>Reducer<br/>N=31</b> | <b>Control<br/>N=34</b> | <b>All Patients<br/>N=65</b> |
| Baseline – mean (SD)                                                             | 3.54 (0.99)             | 3.61 (1.22)             | 3.57 (1.11)                  |
| 6-month follow-up – mean (SD)                                                    | 3.64 (1.03)             | 3.77 (1.16)             | 3.71 (1.09)                  |
| $\Delta$ (baseline to 6MFU) – mean (SD)                                          | 0.10 (0.66)             | 0.17 (1.10)             | 0.13 (0.91)                  |
| % $\Delta$ (baseline to 6MFU)                                                    | <b>2.82%</b>            | <b>4.71%</b>            | <b>3.64%</b>                 |
| <b>t-Test: <math>\Delta</math> in Baseline to 6MFU Control vs. Reducer group</b> | <b>p = 0.783*</b>       |                         | –                            |
| <b>Double product</b>                                                            |                         |                         |                              |
| <b>Double product</b>                                                            | <b>Reducer<br/>N=34</b> | <b>Control<br/>N=35</b> | <b>All Patients<br/>N=69</b> |

|                                                                                      |                    |                    |                    |
|--------------------------------------------------------------------------------------|--------------------|--------------------|--------------------|
| Baseline – mean (SD)                                                                 | 18362.59 (5873.43) | 17904.31 (3964.24) | 18130.13 (4965.09) |
| 6-month follow-up – mean (SD)                                                        | 17932.26 (5131.72) | 17159.31 (5373.22) | 17540.19 (5231.37) |
| $\Delta$ (baseline to 6MFU) – mean (SD)                                              | -430.32 (4641.79)  | -745.00 (4042.84)  | -589.94 (4318.99)  |
| % $\Delta$ (baseline to 6MFU)                                                        | <b>-2.34%</b>      | <b>-4.16%</b>      | <b>-3.25%</b>      |
| <b>t-Test: <math>\Delta</math> in Baseline to 6MFU<br/>Control vs. Reducer group</b> | <b>p = 0.765*</b>  |                    | –                  |

\* Student's t-test

**Table S3:** Dobutamine stress echocardiography (DSE) wall motion score index (WMSI) and modified left coronary artery (LCA) stress wall-motion score index (Changes from Baseline to 6 months follow up – Intent-to-Treat)

| <b>Stress WMSI (SWMSI)</b>                                         |                         |                         |                              |
|--------------------------------------------------------------------|-------------------------|-------------------------|------------------------------|
| <b>DSE – SWMSI</b>                                                 | <b>Reducer<br/>N=48</b> | <b>Control<br/>N=44</b> | <b>All Patients<br/>N=92</b> |
| Baseline – mean (SD)                                               | 1.54 (0.47)             | 1.44 (0.39)             | 1.49 (0.43)                  |
| 6-month follow-up – mean (SD)                                      | 1.33 (0.39)             | 1.32 (0.40)             | 1.33 (0.39)                  |
| Δ (baseline to 6MFU) – mean (SD)                                   | -0.21 (0.38)            | -0.12 (0.32)            | -0.17 (0.35)                 |
| % Δ (baseline to 6MFU)                                             | <b>-13.64%</b>          | <b>-8.33%</b>           | <b>-11.41%</b>               |
| <b>t-Test: Δ in Baseline to 6MFU<br/>Control vs. Reducer group</b> | <b>p = 0.202*</b>       |                         | –                            |
| <b>Stress Modified LCA (SMLCA)-WMSI</b>                            |                         |                         |                              |
| <b>DSE – SMLCA-WMSI</b>                                            | <b>Reducer<br/>N=48</b> | <b>Control<br/>N=46</b> | <b>All Patients<br/>N=94</b> |
| Baseline – mean (SD)                                               | 1.50 (0.53)             | 1.30 (0.43)             | 1.40 (0.49)                  |
| 6-month follow-up – mean (SD)                                      | 1.31 (0.46)             | 1.26 (0.44)             | 1.29 (0.45)                  |
| Δ (baseline to 6MFU) – mean (SD)                                   | -0.19 (0.41)            | -0.04 (0.35)            | -0.12 (0.39)                 |
| % Δ (baseline to 6MFU)                                             | <b>-12.67%</b>          | <b>-3.23%</b>           | <b>-8.57%</b>                |
| <b>t-Test: Δ in Baseline to 6MFU<br/>Control vs. Reducer group</b> | <b>p = 0.064*</b>       |                         | –                            |

\* Student's t-test

Periprocedural Serious Adverse Events (SAE):

In the Reducer group, defined as a composite of death, myocardial infarction (MI), cardiac tamponade, clinically-driven re-dilation of a failed Reducer, life-threatening arrhythmias (ventricular tachycardia [VT] or ventricular fibrillation [VF]), and respiratory failure through 30 days postprocedure, as adjudicated by the CEC. In the Control group, defined as a composite of death, MI, cardiac tamponade, life-threatening arrhythmias (VT or VF), and respiratory failure through 30 days post-procedure, as adjudicated by the CEC.

**Table S4: Periprocedural Serious Adverse Events**

| <b>Adverse Event</b>           | <b>Reducer<br/>N=50</b> | <b>Control<br/>N=54</b> | <b>All Patients<br/>N=104</b> |
|--------------------------------|-------------------------|-------------------------|-------------------------------|
| Death                          | 0 (0%)                  | 0 (0%)                  | 0 (0%)                        |
| Myocardial infarction – NSTEMI | 1 (2.0%)                | 0 (0%)                  | 1 (1.0%)                      |
| Cardiac tamponade              | 0 (0%)                  | 0 (0%)                  | 0 (0%)                        |
| Re-dilation of failed Reducer  | 0 (0%)                  | 0 (0%)                  | 0 (0%)                        |
| Life-threatening arrhythmias   | 0 (0%)                  | 0 (0%)                  | 0 (0%)                        |
| Respiratory failure            | 0 (0%)                  | 0 (0%)                  | 0 (0%)                        |

**Other SAEs up to 30 days follow-up**

Total SAEs

|                                | <b>Reducer<br/>N=76</b> | <b>Control<br/>N=93</b> | <b>All Patients<br/>N=169</b> |
|--------------------------------|-------------------------|-------------------------|-------------------------------|
| Serious adverse events – n (%) | 3 (3.9)                 | 2 (2.2)                 | 5 (3.0)                       |

Breakdown:

| <b>Reducer</b>                    | <b>Control</b>        |
|-----------------------------------|-----------------------|
| Unstable Angina (n=1)             | Unstable Angina (n=1) |
| Acute Myocardial infarction (n=1) | Epigastric pain (n=1) |
| Crohn’s disease (n=1)             |                       |

**Serious Adverse Events** are summarized by patients in the table below. There were 34 SAEs in total (10 Reducer, 24 Control) in 17 patients (6 Reducer, 11 Control). The majority of the SAEs were categorized as cardiac disorders, as would be expected for this patient population. Overall, fewer Reducer patients (12.0%) experienced an SAE than control (20.0%). The most commonly reported SAEs were unstable angina (2.0% Reducer, 7.4% Control), angina pectoris (2.0% Reducer, 5.6% Control) and chest pain (2.0% Reducer, 5.6% Control).

**Table S5:** Serious adverse events

| <b>Sham Control</b>             | <b>Reducer</b>                    |
|---------------------------------|-----------------------------------|
| Atypical chest pain (n = 6)     | Atypical chest pain (n = 1)       |
| Stable angina (n = 5)           | Stable angina (n = 1)             |
| Unstable angina (n = 4)         | Unstable Angina (n = 1)           |
| Acute coronary syndrome (n = 2) | Acute myocardial infarction (n=1) |
| Myocardial infarction (n =1)    | Myocardial infarction (n=1)       |
| Arrhythmia (n = 1)              | Decompensated heart failure (n=1) |
| Multi-system failure (n = 1)    | Gastrointestinal bleeding (n=1)   |
| Pulmonary edema (n = 1)         | Injury (n=1)                      |
| COPD (n = 1)                    | COPD (n = 1)                      |
| Epigastric pain (n = 1)         | Crohn's disease (n=1)             |
| Cough (n = 1)                   |                                   |

## References:

1. Frolicher VF, Myers J. *Manual of Exercise Testing*. 2007.
2. Collins M, Hsieh A, Ohazama CJ, et al. Assessment of regional wall motion abnormalities with real-time 3-dimensional echocardiography. *J Am Soc Echocardiogr* 1999;12:7-14.
3. Spertus JA, Winder JA, Dewhurst TA, Deyo RA, Prodzinski J, McDonnell M, Fihn SD. Development and evaluation of the Seattle Angina questionnaire: A new functional status measure for coronary artery disease. *Journal of the American College of Cardiology* 1995;25(2):333-341.
